# Supplementary material
Source: PubMed Central journal article supplement (PMC5972006)
Supplement: NIHMS56684-supplement-Supplementary_Material.pdf [file NIHMS56684-supplement-Supplementary_Material.pdf]

## High-performance and site-directed *in utero* electroporation with a triple-electrode probe

Marco dal Maschio<sup>1\*</sup>, Diego Ghezzi<sup>1\*</sup>, Guillaume Bony<sup>1\*</sup>, Alessandro Alabastri<sup>2</sup>, Gabriele Deidda<sup>1</sup>, Marco Brondi<sup>3,4</sup>, Sebastian Sulis Sato<sup>3,4</sup>, Remo Proietti Zaccaria<sup>2</sup>, Enzo Di Fabrizio<sup>2,5</sup>, Gian Michele Ratto<sup>3,4</sup>, Laura Cancedda<sup>1#</sup>

<sup>1</sup> Department of Neuroscience and Brain Technologies, Istituto Italiano di Tecnologia, via Morego, 30, 16163 Genova, Italy

<sup>2</sup> Department of Nanostructures, Istituto Italiano di Tecnologia, via Morego, 30 16163 Genova, Italy

<sup>3</sup> Laboratorio NEST, Istituto Nanoscienze CNR and Scuola Normale Superiore, 56120, Pisa, Italy

<sup>4</sup> IIT@NEST, Center for Nanotechnology Innovation, 56120, Pisa, Italy

<sup>5</sup> BIONEM Laboratory, University of Magna Graecia, 88100 Catanzaro, Italy

\* These authors equally contributed to this work.

# Corresponding author: [laura.cancedda@iit.it](mailto:laura.cancedda@iit.it)

- Supplementary Fig. S1:** Cumulative distribution of the number of publications/year with description of *in utero* electroporation targeting somatosensory cortex, hippocampus or visual cortex.
- Supplementary Fig. S2:** Tiled images of a coronal section of the hippocampus.
- Supplementary Fig. S3:** Rostro-caudal coronal series for the hippocampus.
- Supplementary Fig. S4:** Tiled images of a coronal section of the visual cortex.
- Supplementary Fig. S5:** Tiled images of a coronal section of the motor cortex.
- Supplementary Fig. S6:** *In utero* electroporation of hippocampus and visual or motor cortex results in specific transfection of excitatory neurons.
- Supplementary Fig. S7:** Rostro-caudal coronal series for the motor cortex.
- Supplementary Fig. S8:** Tiled images of a sagittal section of the cerebellum.
- Supplementary Fig. S9:** *In utero* electroporation of cerebellum at E14.5 results in specific transfection of Purkinje cells.
- Supplementary Table 1:** Electrophysiological functional properties layer II/III visual cortical neurons transfected with EGFP by the three-electrode configuration in comparison to WT cells.

**Supplementary Fig. S1:** Cumulative distribution of the number of publications/year with description of *in utero* electroporation targeting somatosensory cortex, hippocampus or visual cortex.

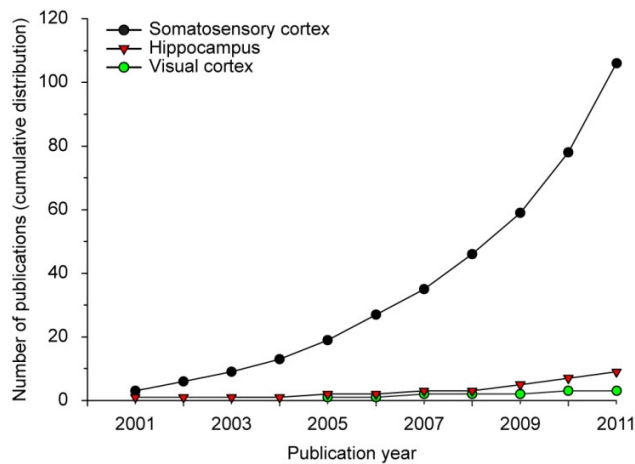

**Supplementary Fig. S1:** The number of publications on IUE targeting different brain areas indicates technical difficulties in electroporating regions other than the somatosensory cortex. The numbers of publications were obtained upon a pubmed quest with “*in utero* electroporation AND cortex” and subsequent careful screen of the results to separate articles on somatosensory from that on visual cortex, or “*in utero* electroporation AND hippocampus” as key words. Note the exponential increase of the number of publications on the somatosensory cortex in comparison to articles on the hippocampus or visual cortex.

**Supplementary Fig. S2:** Tiled images of a coronal section of the hippocampus (P21).

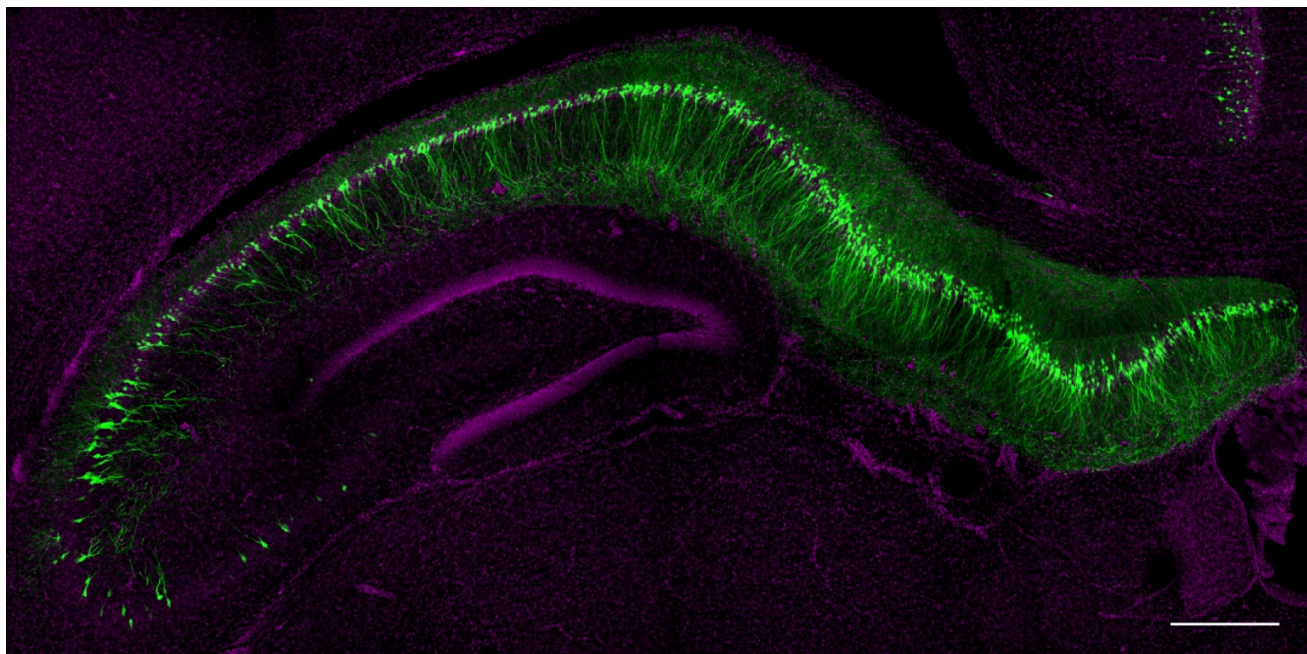

**Supplementary Fig. S2:** Principal cells transfected in CA1-CA2 regions (green). Sections were counterstained with Hoechst (magenta). Scale bar: 500  $\mu\text{m}$ .

**Supplementary Fig. S3:** Rostro-caudal coronal series for the hippocampus (P21).

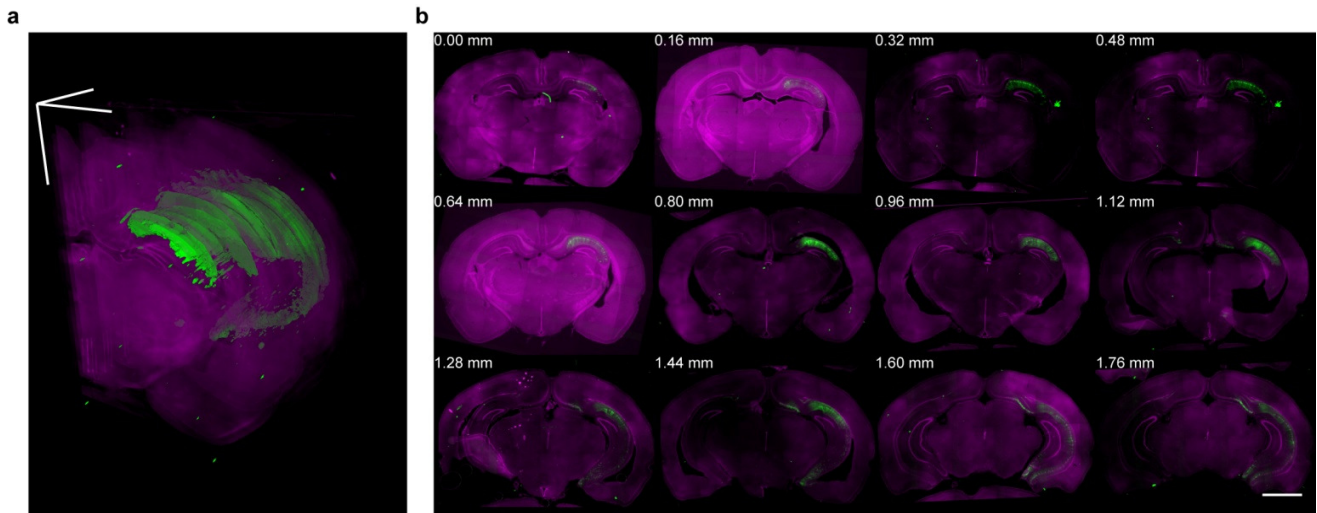

**Supplementary Fig. S3:** (a) 3D rostro-caudal reconstruction of a (P21) brain injected monilaterally and electroporated for targeting the hippocampus. (b) Set of the serial coronal slices utilized for reconstruction in a. Sections were counterstained with Hoechst (magenta). Scale bars: 1 mm

**Supplementary Fig. S4:** Tiled images of a coronal section of the visual cortex (P10).

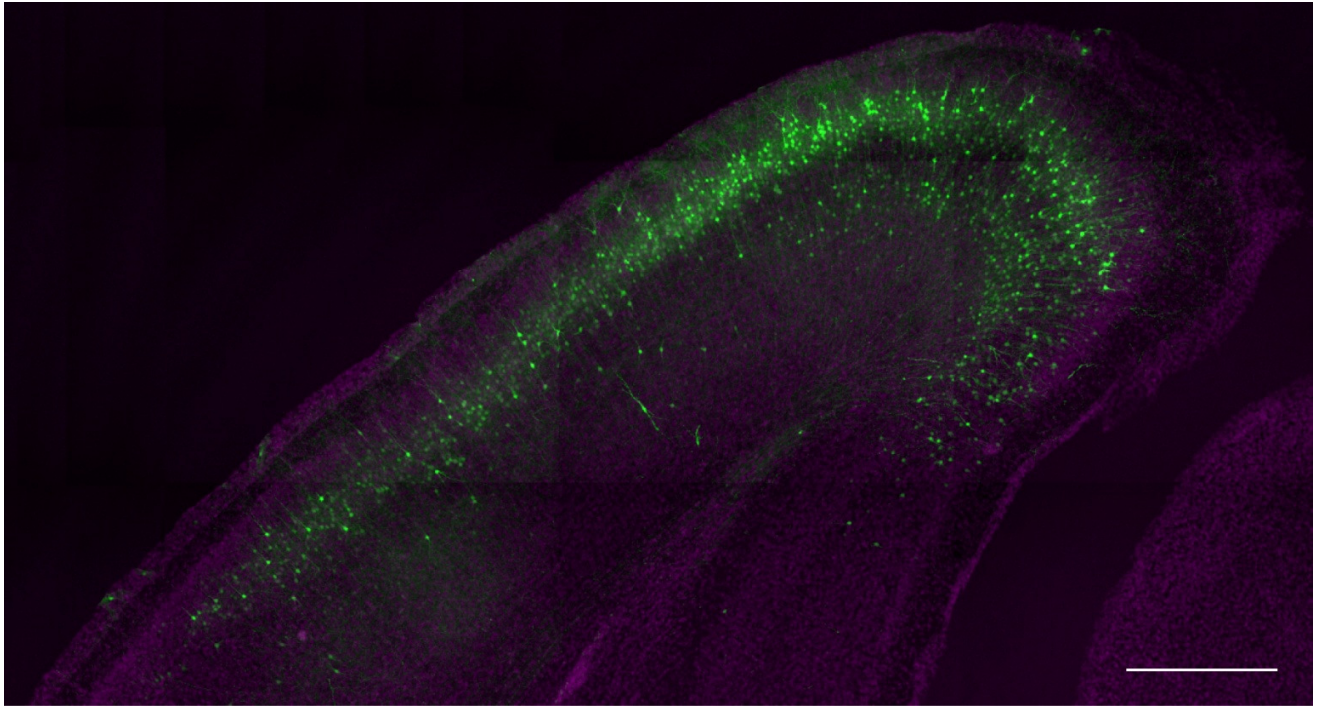

**Supplementary Fig. S4:** Transfected pyramidal cells in green. Sections were counterstained with Hoechst (magenta). Scale bar: 500  $\mu\text{m}$ .



**Supplementary Fig. S5:** Tiled images of a coronal section of the motor cortex (P20).

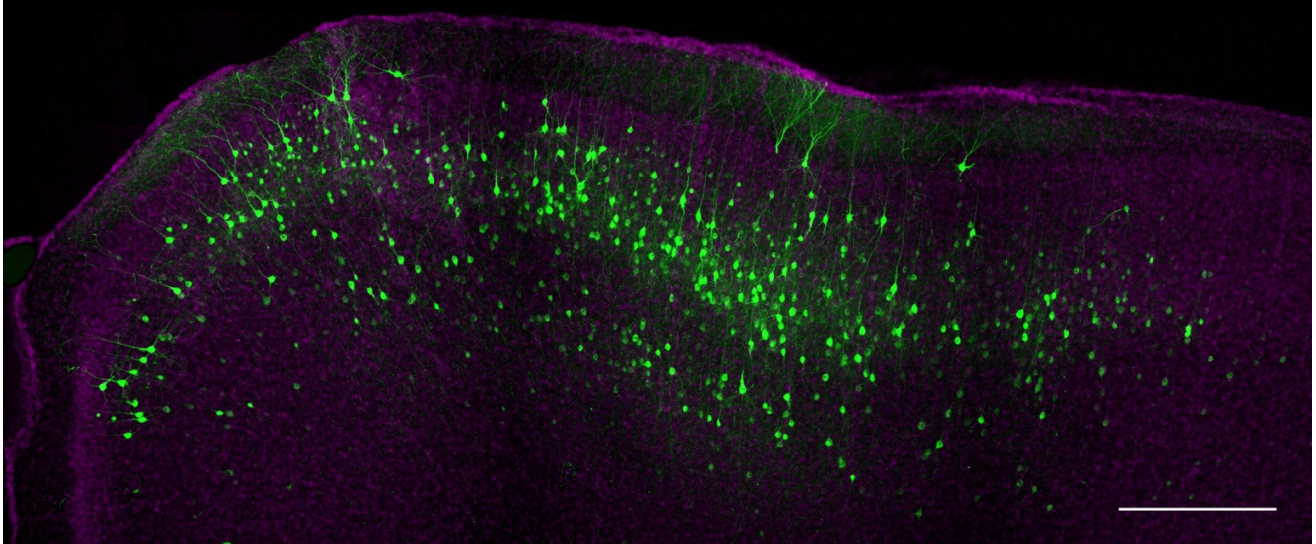

**Supplementary Fig. S5:** Transfected pyramidal cells in layer II/III (green). Sections were counterstained with Hoechst (magenta). Scale bar: 500  $\mu\text{m}$ .

**Supplementary Fig. S6:** *In utero* electroporation of hippocampus and visual or motor cortex results in specific transfection of excitatory neurons.

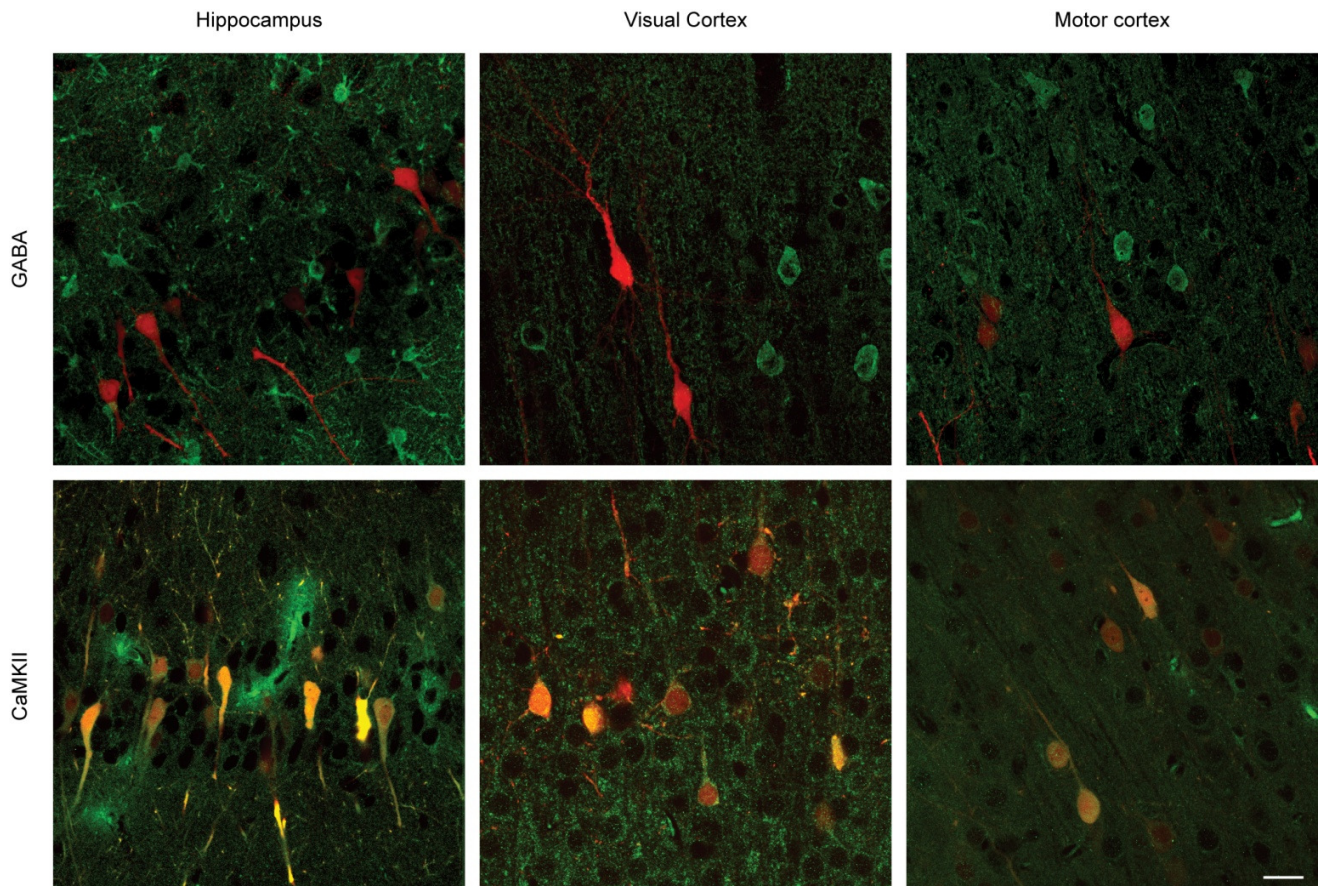

**Supplementary Fig. S6:** *In utero* electroporation of hippocampus and visual or motor cortex results in specific transfection of excitatory neurons (red, td-Tomato fluorescence). Confocal images of coronal sections (P21) stained for excitatory-cell marker CaMKII and inhibitory-cell marker GABA. Tomato-expressing cells stained positive only for CaMKII. Scale bar: 20  $\mu$ m

**Supplementary Fig. S7:** Rostro-caudal coronal series for the motor cortex.

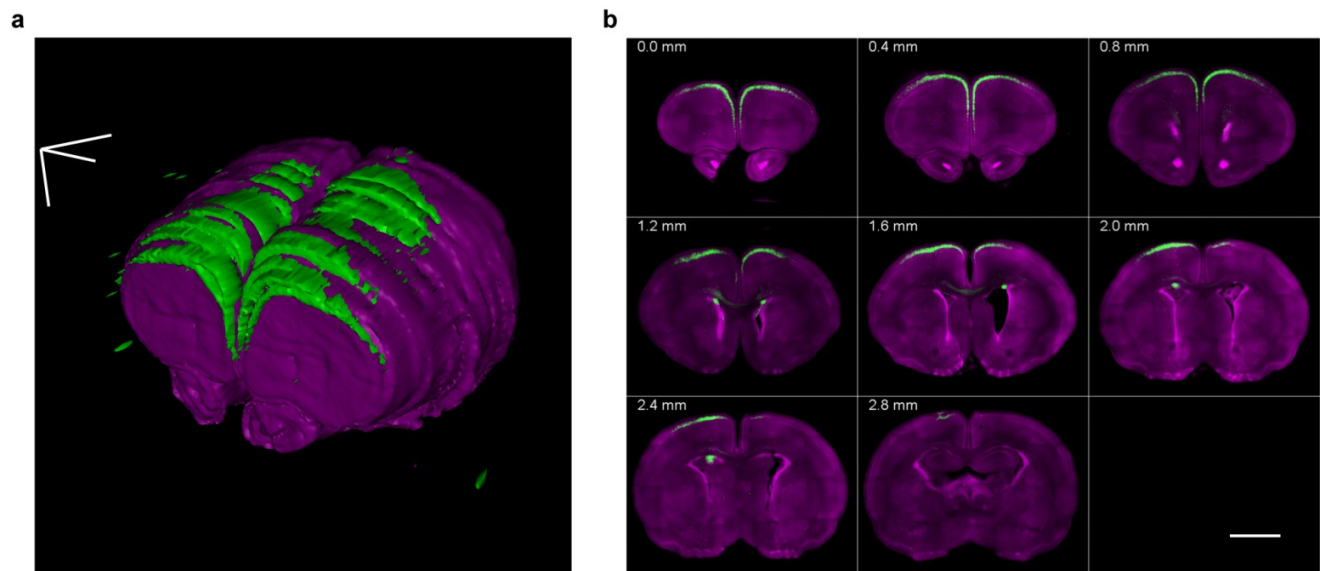

**Supplementary Fig. S7:** (a) 3D rostro-caudal reconstruction of a (P15) brain injected bilaterally and electroporated for targeting the motor cortex. (b) Set of the serial coronal slices utilized for reconstruction in a. Sections were counterstained with Hoechst (magenta). Scale bars: 1 mm



**Supplementary Fig. S8:** Tiled images of a sagittal section of the cerebellum (P14).

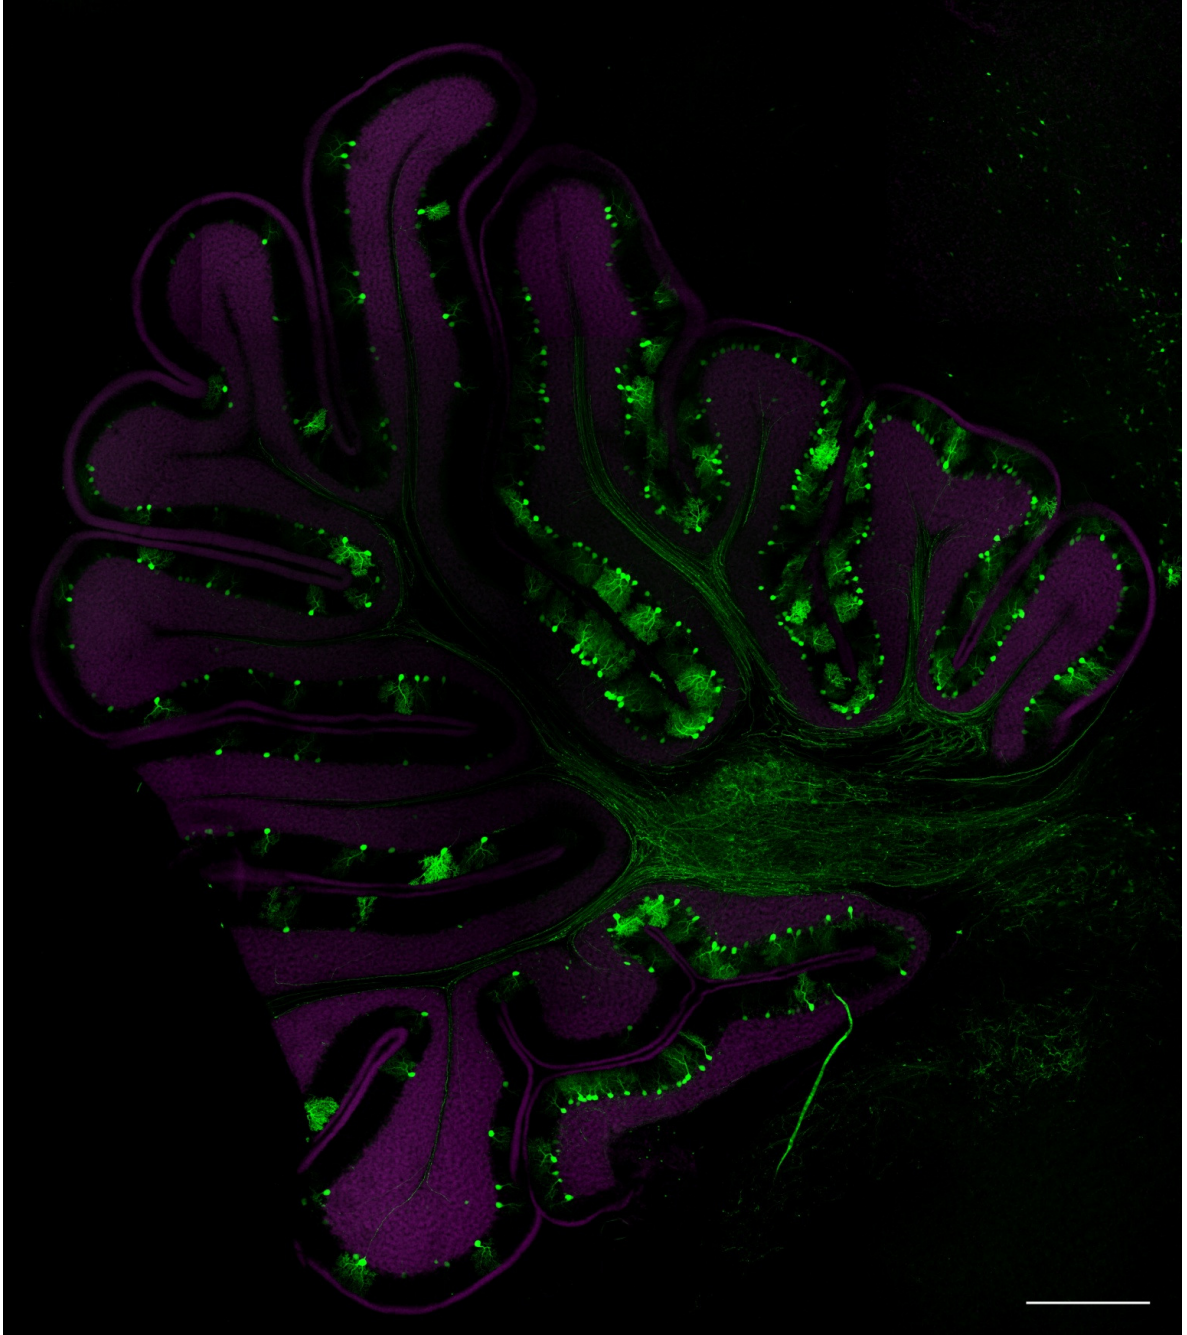

**Supplementary Fig. S8:** Transfected with EGFP Purkinje cells (green). Sections were counterstained with Hoechst (magenta). Scale bar: 500  $\mu\text{m}$ .

**Supplementary Fig. S9:** *In utero* electroporation of cerebellum at E14.5 results in specific transfection of Purkinje cells.

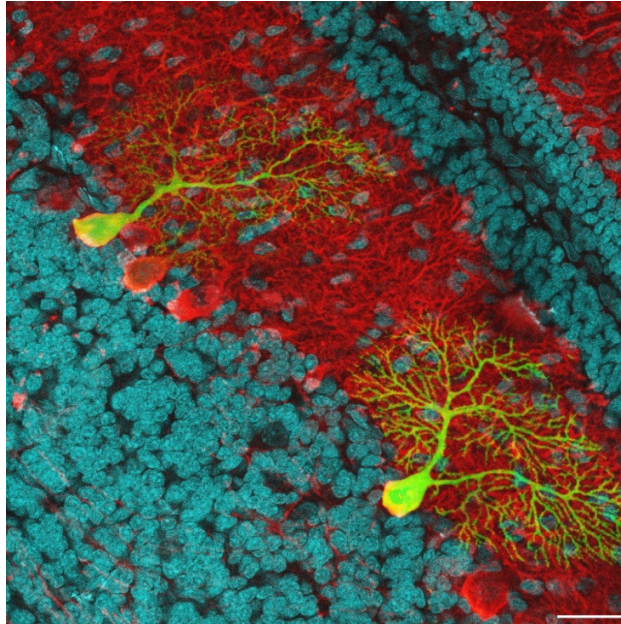

**Supplementary Fig. S9:** Confocal images of a coronal section (P14) with Purkinje-cells (green, EGFP fluorescence) stained for their specific marker Calbindin (red, alexa 568) and cell nuclei (cyan, Hoechst). Scale bar: 50  $\mu$ m

**Supplementary Table 1:** Electrophysiological functional properties of layer II/III visual cortical neurons.

|              | <b>Membrane Resting Potential (mV)</b> | <b>Membrane Capacitance (pF)</b> | <b>Membrane Resistance (M<math>\Omega</math>)</b> | <b>sEPSC Frequency (Hz)</b> |
|--------------|----------------------------------------|----------------------------------|---------------------------------------------------|-----------------------------|
| WT (n = 4)   | -50.5 $\pm$ 0.5                        | 56.74 $\pm$ 4.35                 | 704.7 $\pm$ 133.3                                 | 1.42 $\pm$ 0.47             |
| EGFP (n = 5) | -53 $\pm$ 3.6                          | 71.22 $\pm$ 5.74                 | 621 $\pm$ 172.1                                   | 1.95 $\pm$ 0.5              |

Electrophysiological functional properties of layer II/III visual cortical neurons transfected with EGFP by the three-electrode configuration in comparison to WT cells. Data are expressed as average of all recorded cells  $\pm$  SEM.
